# Supplementary material
Source: PubMed Central journal article supplement (PMC9120411)
Supplement: gutjnl-2021-325310supp005.pdf [file gutjnl-2021-325310supp005.pdf]

## SUPPLEMENTAL FIGURE LEGENDS

### Figure S1. Immunohistochemical analysis of GIF-GFP and GIF-Cre-RnTnG mouse

**stomachs.** A) Scheme for In-frame rtTA fusion of a GIF gene in mice to generate the GIF-rtTA mouse allele using CRISPR technology. CRISPR-Cas9 stimulates homologous recombination between the unmodified chromosome (Chr) and the homologous donor, resulting in an in-frame, 3' terminal 2A-rtTA-tagged gene. CRISPR/Cas9 technology is employed to introduce a double-stranded DNA break (DSB) at a target site before the stop codon. A synthetic guide RNA (sgRNA) was designed in the targeting region. A Donor single strand DNA (ssDNA) containing P2A-rtTA DNA fragment flanked by an upstream (5' arm, ~1kb) and downstream (3' arm, ~1kb) homologous fragments designed according to the targeting site was used for site-specific knock-in of the P2A-rtTA through endogenous homology-directed repair. B&C) Immunohistochemistry of GFP in GIF-GFP mice. B) Sections of the liver, pancreas, intestine and lung tissues of GIF-GFP mice were immunostained with antibodies against GFP at 1 week after DOX treatment. No GFP+ cells were observed in the tissues. C) Sections of the stomach tissues of GIF-rtTA or GIF-GFP mice were immunostained with antibodies against GFP at 1 week after DOX treatment. Black and red boxes depict enlarged regions. D) Immunohistochemistry of GFP in GIF-Cre-RnTnG mice. Sections of the stomach tissues of Dox-treated GIF-Cre-RnTnG mice treated with or without L635 were immunostained with antibodies against GFP. Black and red boxes depict regions enlarged. E) Quantitation of glands that contain GFP+ cells in the corpus and antrum in GIF-GFP mouse stomachs with DOX treatment. The graph displays the percentage of GFP+ glands and a total of 100 glands per mouse

were counted in the corpus or antrum. Statistical significance was determined by unpaired Welch's test ( $P = 0.0012$ ,  $N = 3$  per group). F) Quantitation of glands that contain GFP+ cells in the corpus and antrum in GIF-Cre-RnTnG mouse stomachs with DOX treatment for 1 week. The graph displays the percentage of GFP+ glands and a total of 100 glands per mouse were counted in the corpus or antrum. Statistical significance was determined by unpaired Welch's test ( $P < 0.0001$ ,  $N = 3$  per group).

**Figure S2. Immunofluorescence staining for GFP-labeled cells after long term-lineage tracing.** A) Immunostaining for GFP (green), GIF (red) and Ki-67 (blue) at 2 weeks ( $n=3$ ), 2 ( $n=3$ ), 6 ( $n=2$ ), and 12 ( $n=3$ ) months following Dox treatment in GIF-Cre-RnTnG mouse stomachs. White arrows indicate enlarged area in panel B & C. B) Yellow arrows indicate GIF-negative GFP-labeled cells at 6 months following Dox treatment. C) Yellow arrow indicated co-positive cells for GFP and Ki67 at 12 months following Dox treatment. D) Immunostaining for GFP (green), UEAI (red), GSII (blue) and H/K-ATPase (white) at 12 months following Dox treatment in GIF-Cre-RnTnG mouse stomachs. White arrow indicates enlarged area and yellow arrows indicate co-positive cells for GFP and UEAI, GSII or H/K-ATPase.

**Figure S3. Immunofluorescence staining for GFP-labeled cells in the GIF-Cre-RnTnG mouse stomachs.** A) GIF-Cre-RnTnG mice were administered without (untreated) or with L635 for 1 or 3 doses (initiation or completion) 2 weeks after the Dox treatment for 1 week. Sections of the stomach tissues were immunostained with antibodies against GFP (green), Ki67 (red), UEAI (white). Nuclei were counterstained with Hoechst (blue). White arrows indicate GFP+Ki67- cells 1 dose after the L635

treatment. Several GFP+ cells were observed at the surface cell zone (yellow arrows) in the glands of stomach tissues treated with L635 for 3 doses, but no GFP+ cells were copositive for Ki67 in this region. Dotted boxes depict enlarged regions. N = 3 mice per group. B) Sections of the stomach tissues treated with L635 for 3 doses (completion) were immunostained with antibodies against GFP (green), Ki67 (red), GSII (blue). Dotted box depicts enlarged region. N = 3 mice per group. C) Quantitation of co-positive cells for GFP, GSII and/or Ki67 per 20 x field. N = 3 mice per group.

**Figure S4. Immunofluorescence staining for GFP-labeled cells in the GIF-Cre-**

**RnTnG mouse stomachs.** GIF-Cre-RnTnG mice were administered without (untreated) or with L635 for 3 doses (completion) 2 weeks after the Dox treatment for 1 week. A) Sections of the stomach tissues were co-immunostained with antibodies against GFP (green), GIF (red) and GSII (white) or GFP (green), UEAI (red), HK/ATP-ase (HK, gray). Nuclei were counterstained with Hoechst (blue). Dotted boxes depict regions enlarged. White dotted lines depict mucosa regions and yellow dotted lines depict the GFP+ cell zones. White arrows indicate GFP-labeled SPEM cells, co-positive for GIF, and GSII or GFP-labeled surface cells, co-positive for UEAI. B) Sections of the stomach tissues were co-immunostained with antibodies against GFP (green), Muc5ac (red) and UEAI (blue). Dotted boxes depict regions enlarged. White arrows indicate GFP-labeled surface cells, co-positive for both Muc5ac and UEAI. N = 3 mice per group.

**SUPPLEMENTAL TABLE 1. KEY RESOURCES TABLE**

| REAGENT or RESOURCE                                                                            | SOURCE                             | IDENTIFIER |
|------------------------------------------------------------------------------------------------|------------------------------------|------------|
| <b>Antibodies</b>                                                                              |                                    |            |
| Rabbit anti-GFP (1:5,000)                                                                      | Novus                              | NB600-308  |
| Goat anti-GIF (1:1,000)                                                                        | A gift from Dr. David Alpers       | N/A        |
| Mouse anti-H/K-ATPase (1:10,000)                                                               | A gift from Dr Adam Smolka         | N/A        |
| Rabbit anti-Ki67 (1:1000)                                                                      | Cell Signaling Technology          | 9129       |
| Mouse anti-P120 (1:500)                                                                        | BD Biosciences                     | 610134     |
| UEA1-lectin (1:2000)                                                                           | Sigma                              | L9006      |
| GSII-Lectin (1:2,000)                                                                          | Invitrogen                         | L32451     |
| Rabbit anti-GPR30 (1:200)                                                                      | abcam                              | ab260033   |
| Mouse anti-Muc5ac (1:500)                                                                      | NeoMarkers                         | MS-551-P   |
| Donkey anti-Rat IgG (H+L) Highly Cross-Adsorbed Secondary Antibody, Alexa Fluor 594 (1:500)    | ThermoFisher                       | A-21209    |
| Donkey anti-Rat IgG (H+L) Cross-Adsorbed Secondary Antibody, DyLight 680 (1:500)               | ThermoFisher                       | SA5-10030  |
| Donkey anti-Rabbit IgG (H+L) Highly Cross-Adsorbed Secondary Antibody, Alexa Fluor 488 (1:500) | ThermoFisher                       | A-21206    |
| Donkey anti-Rabbit IgG (H+L) Highly Cross-Adsorbed Secondary Antibody, Alexa Fluor 546 (1:500) | ThermoFisher                       | A-10040    |
| Donkey anti-Rabbit IgG (H+L) Highly cross-Adsorbed Secondary Antibody, Alexa Fluor 790 (1:500) | ThermoFisher                       | A-11374    |
| Donkey anti-Goat IgG (H+L) Highly Cross-Adsorbed Secondary Antibody, Alexa Fluoro 488 (1:500)  | ThermoFisher                       | A-11055    |
| Donkey anti-Goat IgG (H+L) Highly Cross-Adsorbed Secondary Antibody, Alexa Fluor 568 (1:500)   | ThermoFisher                       | A-11057    |
| Donkey anti-Goat IgG (H+L) Highly Cross-Adsorbed Secondary Antibody, Alexa Fluor 647 (1:500)   | ThermoFisher                       | A-21447    |
| Donkey anti-Monkey Highly Cross-Adsorbed Secondary Antibody, Alexa Fluoro 790 (1:500)          | ThermoFisher                       | A-11371    |
| <b>Chemicals, Peptides, and Recombinant Proteins</b>                                           |                                    |            |
| Viagen Direct PCR (Ear) Lysis Reagent                                                          | Fisher Scientific                  | 402-E      |
| Viagen Proteinase K                                                                            | Fisher Scientific                  | 501-PK     |
| 4% paraformaldehyde solution in PBS                                                            | Fisher Scientific                  | AAJ19943K2 |
| L-635                                                                                          | Vanderbilt Chemical Synthesis Core | N/A        |
| Doxycycline Hyclate                                                                            | Sigma-Aldrich Genosys              | D9891      |
| Histoclear                                                                                     | National Diagnostics               | HS-200     |
| <b>Critical Commercial Assays</b>                                                              |                                    |            |
| Platinum II Hot Start PCR Master Mix (2x)                                                      | Thermo Fisher                      | 1400014    |
| DreamTaq Green PCR Master Mix (2x)                                                             | Thermo Fisher                      | K1081      |
| Promega GoTaq G2 Green Master Mix (2x)                                                         | Thermo Fisher                      | M7823      |
| <b>Experimental Models: Organisms/Strains</b>                                                  |                                    |            |
| C57Bl/6J                                                                                       | The Jackson Laboratory             | 000664     |
| Gif-rtTA                                                                                       | Applied StemCell                   | N/A        |

|                                                                                                                          |                          |                                                                     |
|--------------------------------------------------------------------------------------------------------------------------|--------------------------|---------------------------------------------------------------------|
| TetO-H2BGFP                                                                                                              | The Jackson Laboratory   | 005104                                                              |
| TetO-Cre                                                                                                                 | The Jackson Laboratory   | 006224                                                              |
| Gt(ROSA)26Sor <sup>tm</sup> (CAG-tdTomato*,-EGFP*)Ees/J 023537                                                           | The Jackson Laboratory   | 023537                                                              |
| <b>Oligonucleotides</b>                                                                                                  |                          |                                                                     |
| <b>GIF-rtTA WT Primers</b><br>F: CATGAGCACATCACAGCCAAC<br>R: GTTAGTGCAGAAGTTGCGTC                                        | Sigma-Aldrich<br>Genosys | N/A                                                                 |
| <b>TetO-H2BGFP Primers</b><br>F: GCGCTCGAAAATGTCGTTCA<br>R: CGTGACGGTGGGAGGTCTA                                          | Sigma-Aldrich<br>Genosys | N/A                                                                 |
| <b>TetO-H2BGFP WT Primers</b><br>F: CTAGGCCACAGAATTGAAAGATCT<br>R: GTAGGTGGAAATTCTAGCATCATCC                             | Sigma-Aldrich<br>Genosys | N/A                                                                 |
| <b>TetO-Cre Primers</b><br>F: GCGGTCTGGCAGTAAAACTATC<br>R: GTGAAACAGCATTGCTGTCACTT                                       | Sigma-Aldrich<br>Genosys | N/A                                                                 |
| <b>Rosa nTnG Primers</b><br>WT: GGAGCGGGAGAAATGGATATG<br>Common: AAAGTCGCTCTGAGTTGTTAT<br>Mutant:CCAGGCGGGCCATTTACCGTAAG | Sigma-Aldrich<br>Genosys | N/A                                                                 |
| <b>Experimental Models: Organisms/Strains</b>                                                                            |                          |                                                                     |
| Mouse: GIF-rtTA                                                                                                          | This paper               | N/A                                                                 |
| Mouse: TetO-H2BGFP                                                                                                       | The Jackson Laboratory   | Stock No:<br>005104                                                 |
| Mouse: TetO-Cre                                                                                                          | The Jackson Laboratory   | Stock No:<br>006234                                                 |
| Mouse: Rosa-RnTnG                                                                                                        | The Jackson Laboratory   | Stock No:<br>023035                                                 |
| <b>Software and Algorithms</b>                                                                                           |                          |                                                                     |
| ImageJ                                                                                                                   | (Schneider et al., 2012) | <a href="https://imagej.nih.gov/ij/">https://imagej.nih.gov/ij/</a> |
| Photoshop 2020                                                                                                           | Adobe                    | Version 21.1.2                                                      |
| GraphPad Prism                                                                                                           | GraphPad Software        | Version 8.4.2                                                       |
| MATLAB                                                                                                                   | MathWorks                |                                                                     |
