# Supplementary material
Source: PubMed Central journal article supplement (PMC9120411)

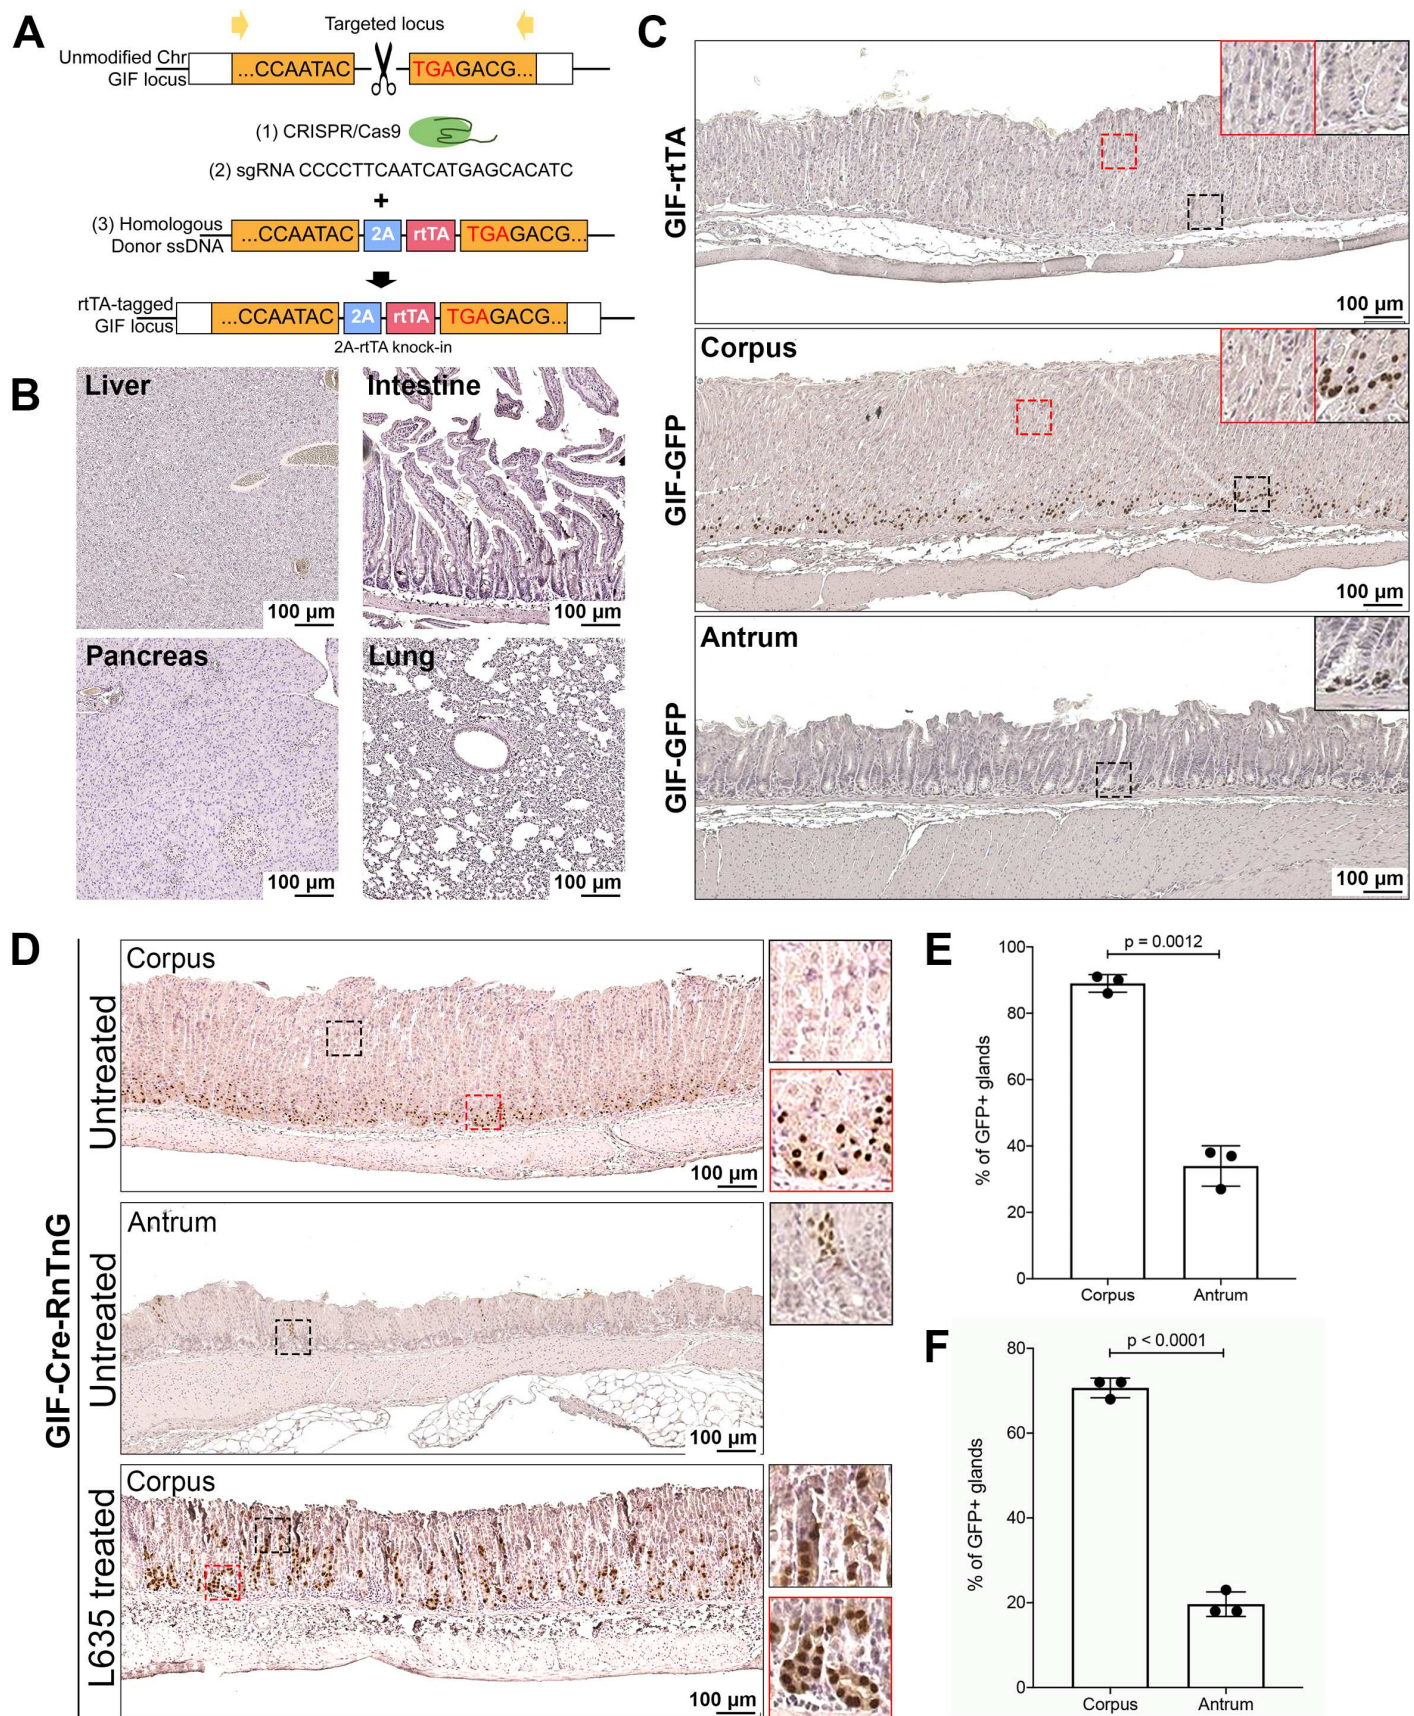

Supplement: gutjnl-2021-325310supp001.pdf [file gutjnl-2021-325310supp001.pdf]

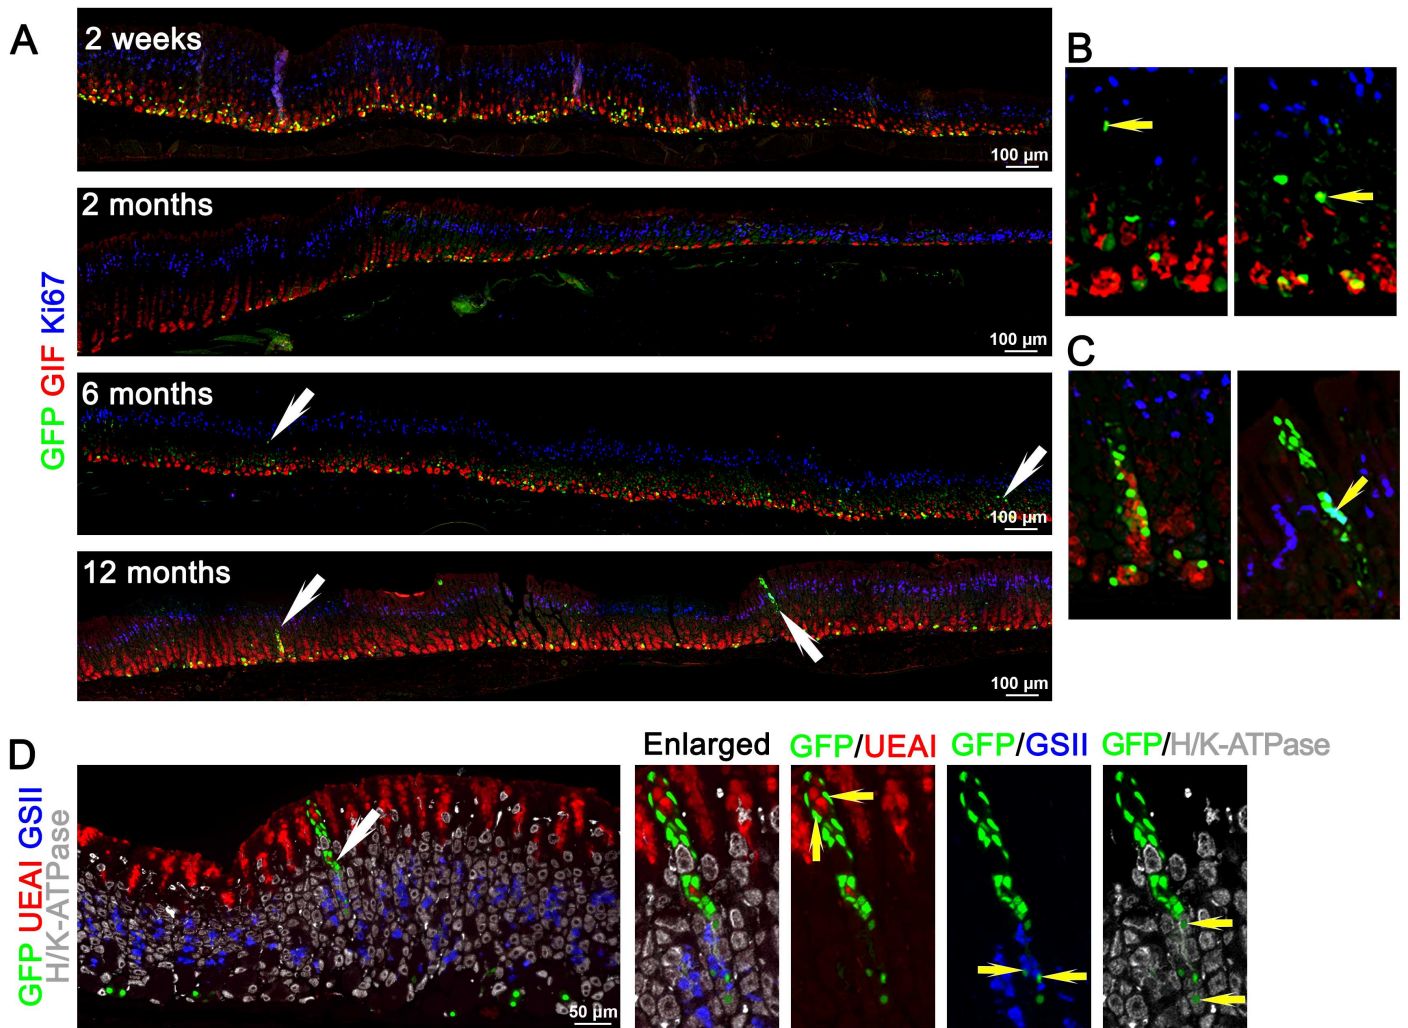

Supplement: gutjnl-2021-325310supp002.pdf [file gutjnl-2021-325310supp002.pdf]

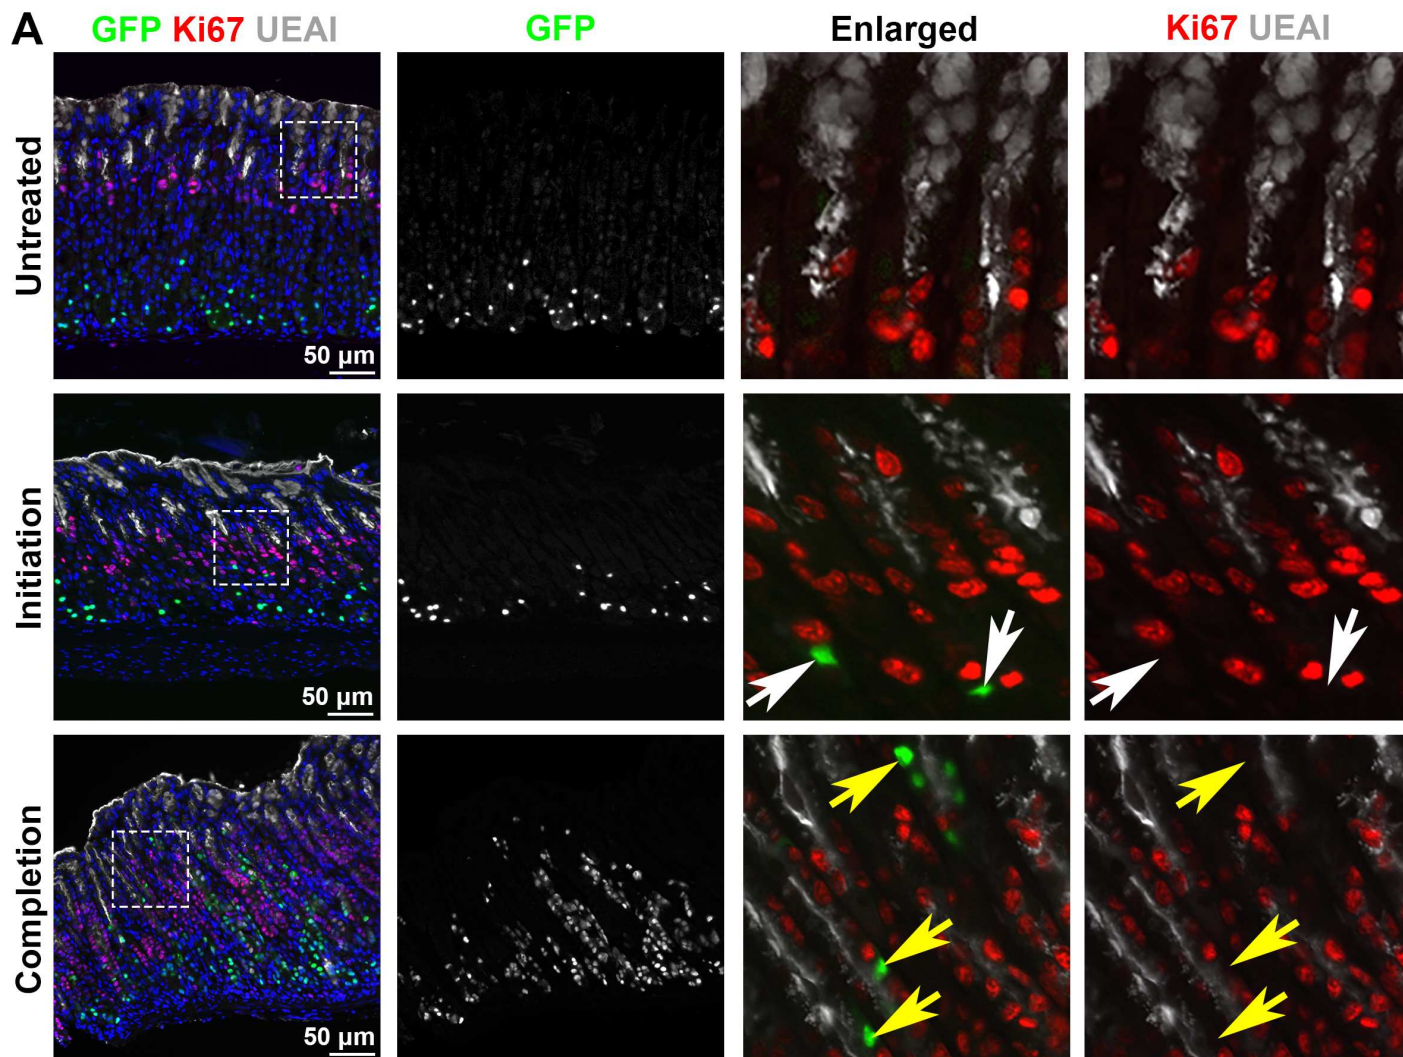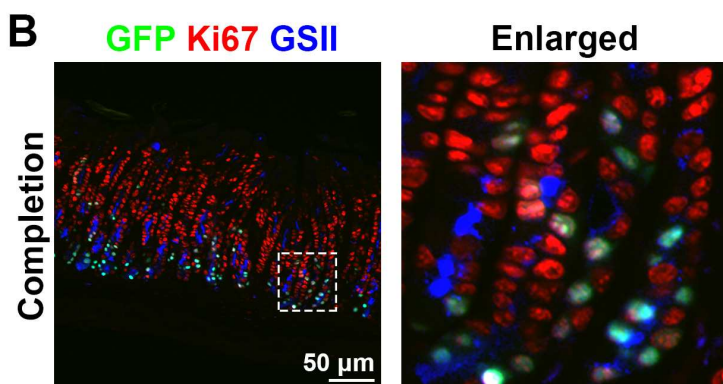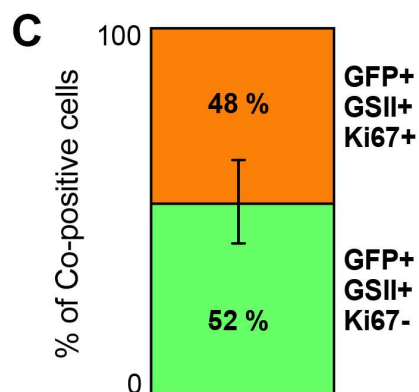

Supplement: gutjnl-2021-325310supp003.pdf [file gutjnl-2021-325310supp003.pdf]

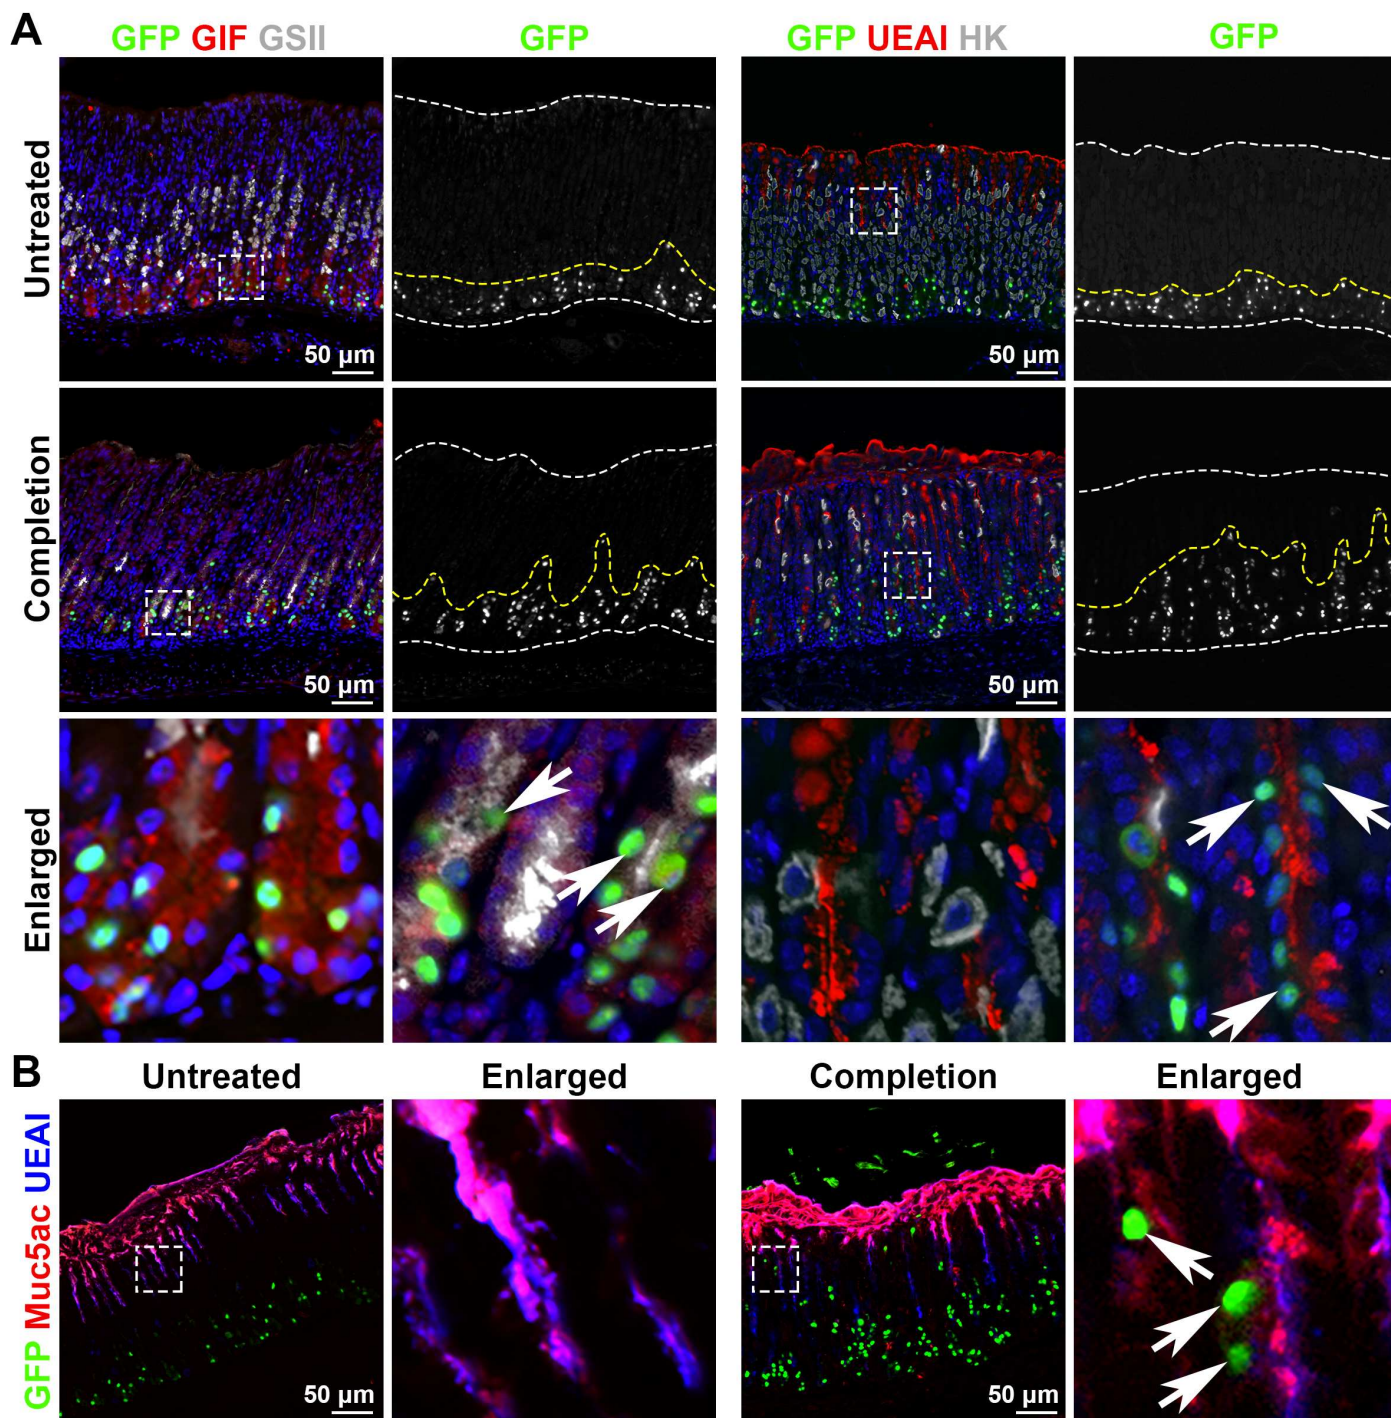

Supplement: gutjnl-2021-325310supp004.pdf [file gutjnl-2021-325310supp004.pdf]
